# Supplementary material
Source: Springer Nature journal article supplement (https://www.springermedizin.de/resource/supplementary/12967_2011_845_MOESM2_ESM.pdf/9577170)

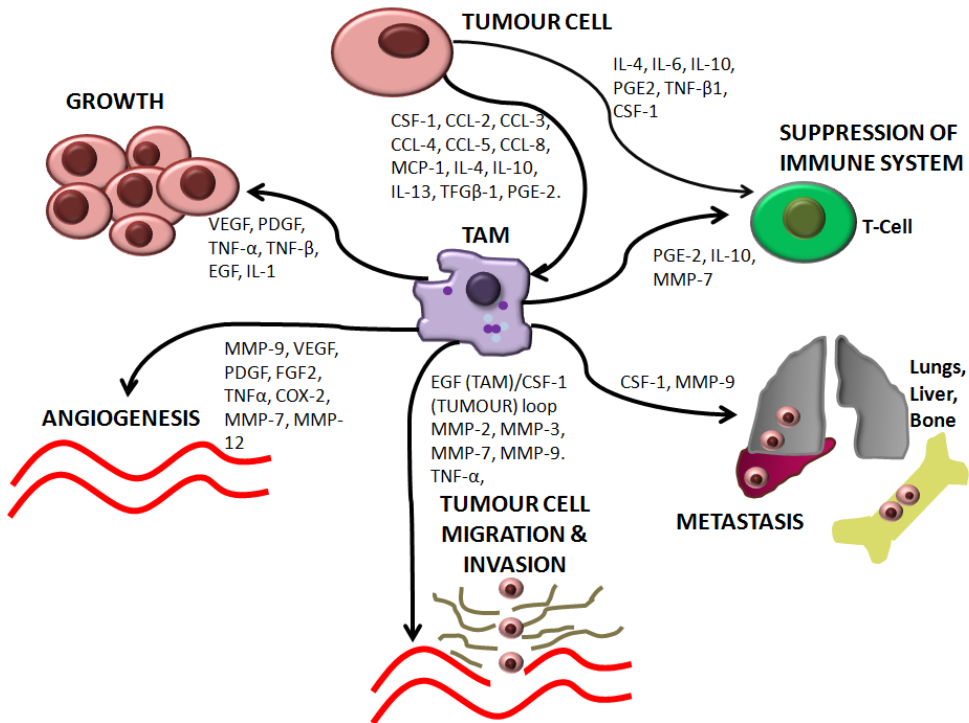

Supplement: MOESM2 [file 9577170]
